# Supplementary material for: Crystal growth, structures and magnetic properties of copper hydroxide compounds with distorted diamond chain magnetic networks
Source: Royal Society of Chemistry journal article supplement (doi:10.1039/c6ce01631f), 2016-01-01
Supplement: c6ce01631f1.pdf [file c6ce01631f1.pdf]

## Supporting Information

### Crystal Growth, Structures and Magnetic Properties of Copper Hydroxide Compounds with Distorted Diamond Chain Magnetic Networks

Wataru Fujita,<sup>a\*</sup> Akio Tokumitsu,<sup>a</sup> Yutaka Fujii,<sup>b</sup> Hikomitu Kikuchi<sup>b</sup>

<sup>a</sup>Department of Informatics and Biological Sciences, Nagoya City University, 1 Yamanohata, Mizuho-cho, Mizuho-ku, Nagoya 467-8501, Japan.

<sup>b</sup>Department of Applied Physics, University of Fukui. Bunkyo 3-9-1, Fukui 910-8507, Japan.

E-mail: [fujitaw@nsc.nagoya-cu.ac.jp](mailto:fujitaw@nsc.nagoya-cu.ac.jp)

|                                                                               |     |
|-------------------------------------------------------------------------------|-----|
| 1. Crystal Structures, Selected Cu–O Bond Lengths and Cu–O–Cu Bridging Angles | S2  |
| 2. Magnetization at 2 K.                                                      | S13 |
| 3. Magnetic Parameters                                                        | S17 |
| 4. References                                                                 | S18 |

## 1. Crystal Structures

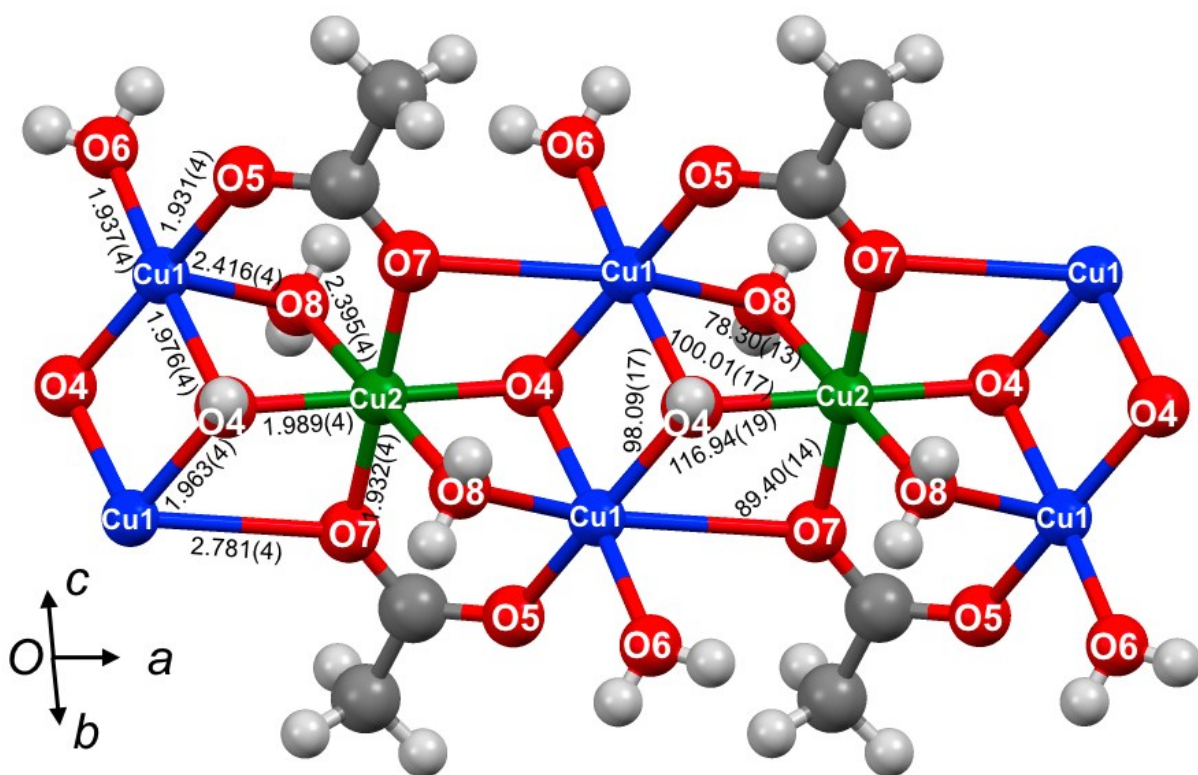

Figure S1. Selected Cu-O bond lengths and Cu-O-Cu bridging angles in the diamond chain unit in **1**.

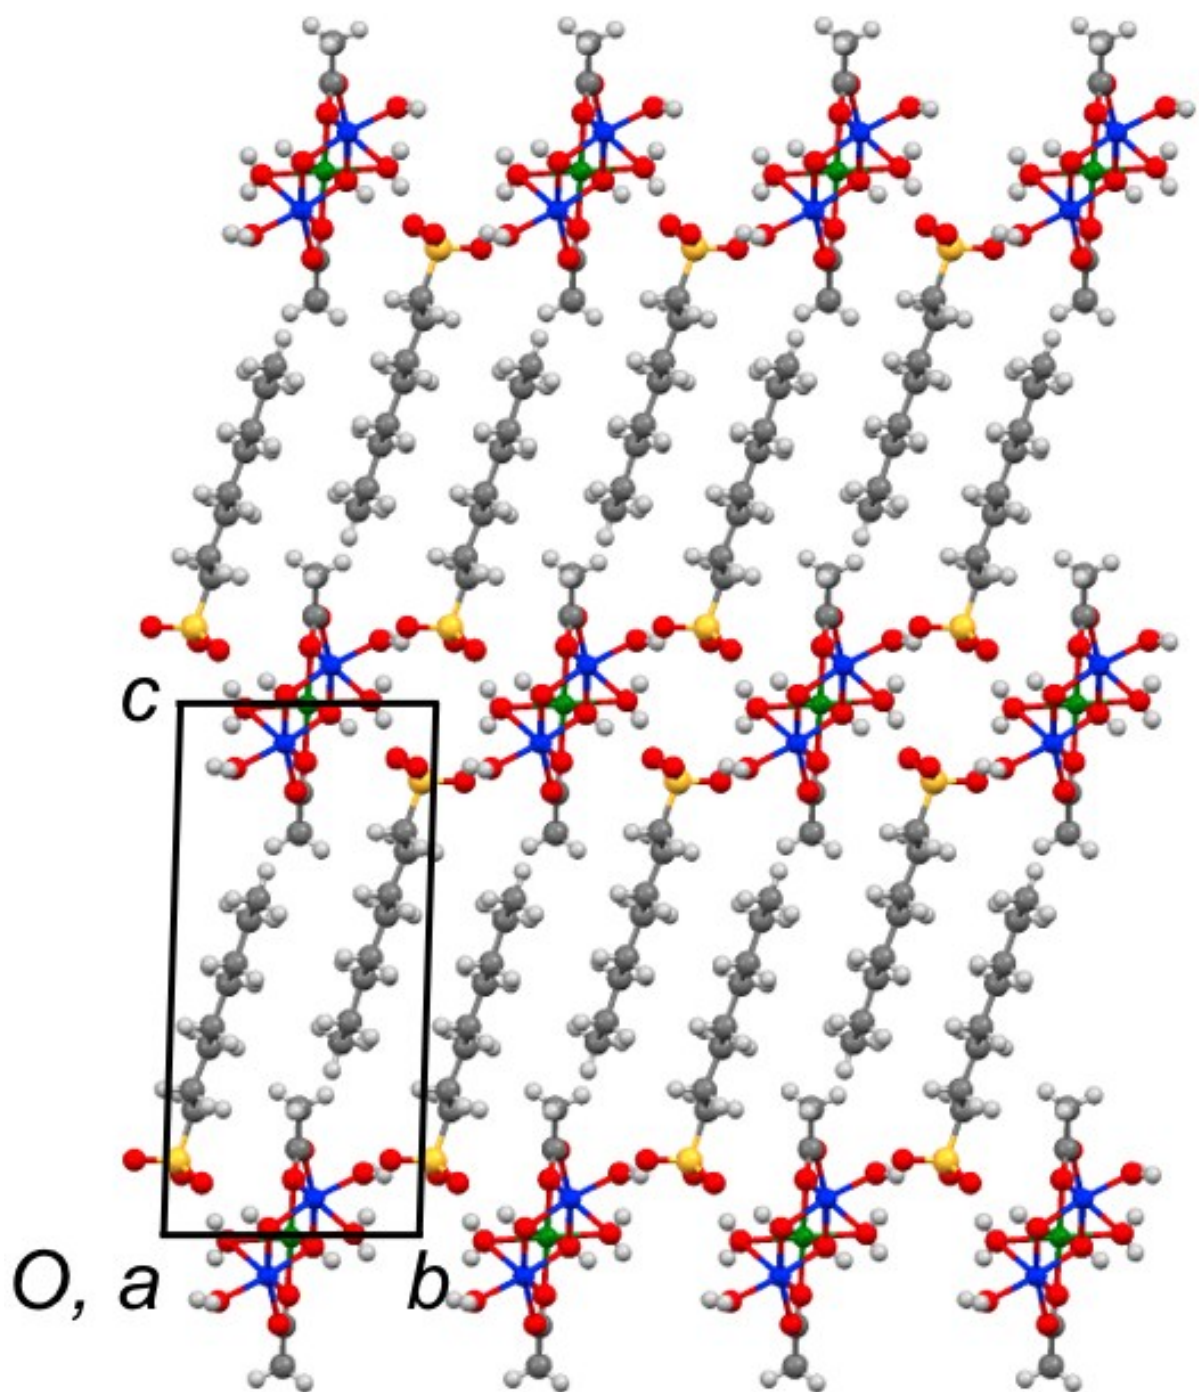

Figure S2. Crystal structure of **2** along the *a* axis. The spheres correspond to Cu (blue, green), O (red), C (dark grey), S (yellow), and H (light grey) atoms.

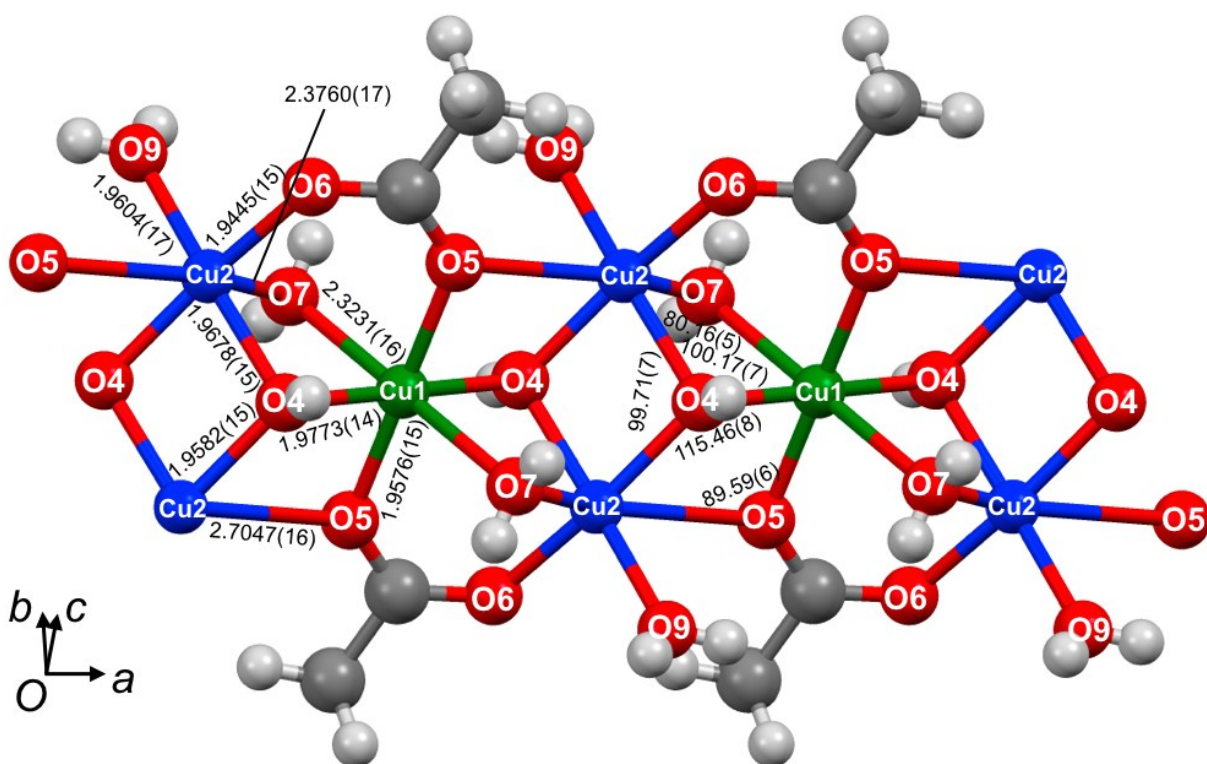

Figure S3. Selected Cu-O bond lengths and Cu-O-Cu bridging angles in the diamond chain unit in **2**.

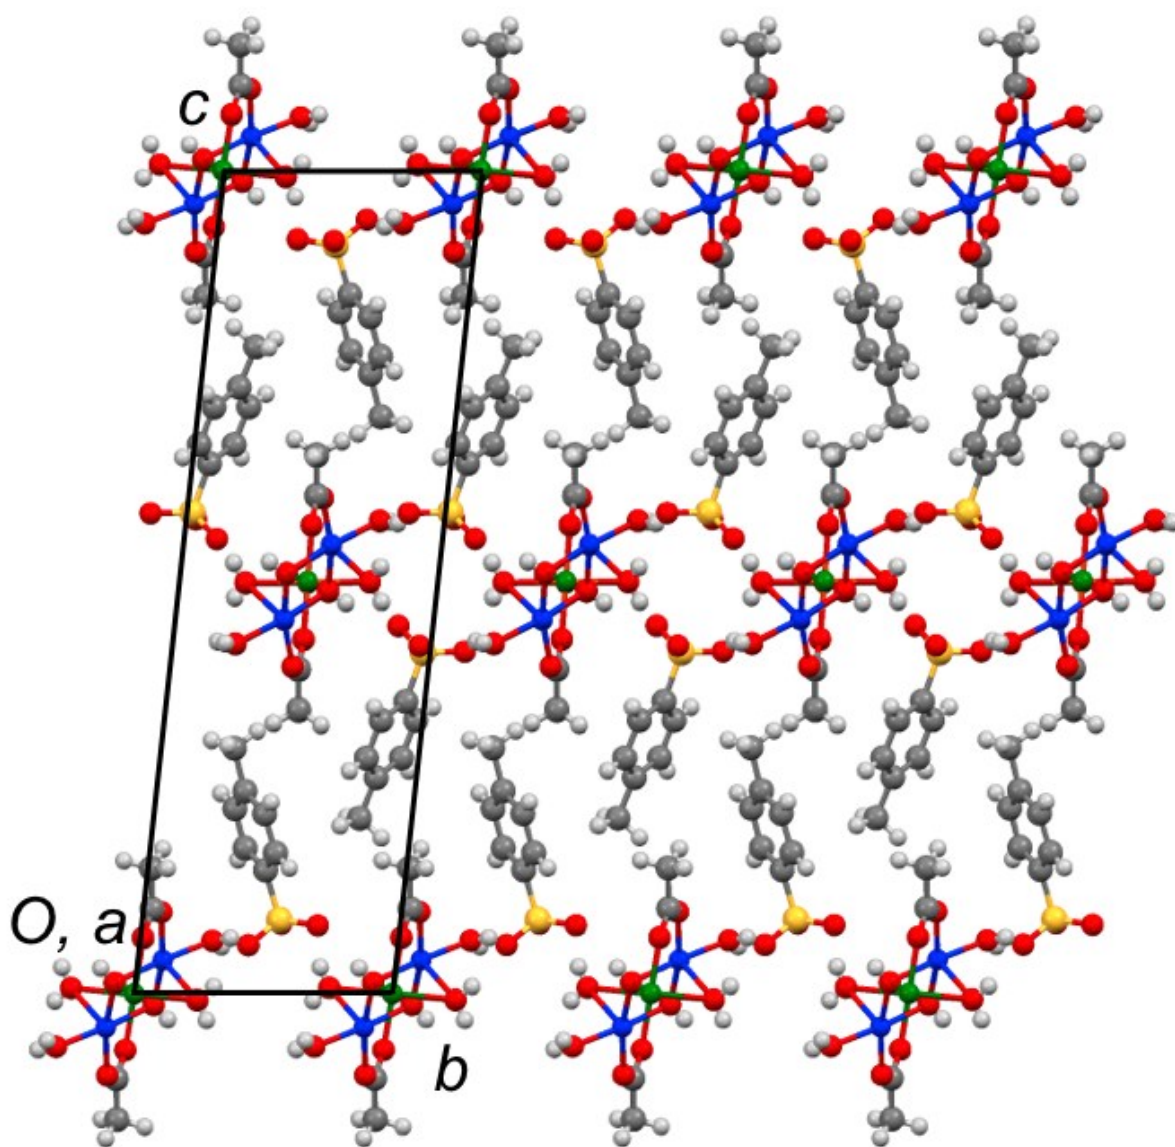

Figure S4. Crystal structure of **3** along the  $a$  axis. The spheres correspond to Cu (blue, green), O (red), C (dark grey), S (yellow), and H (light grey) atoms.



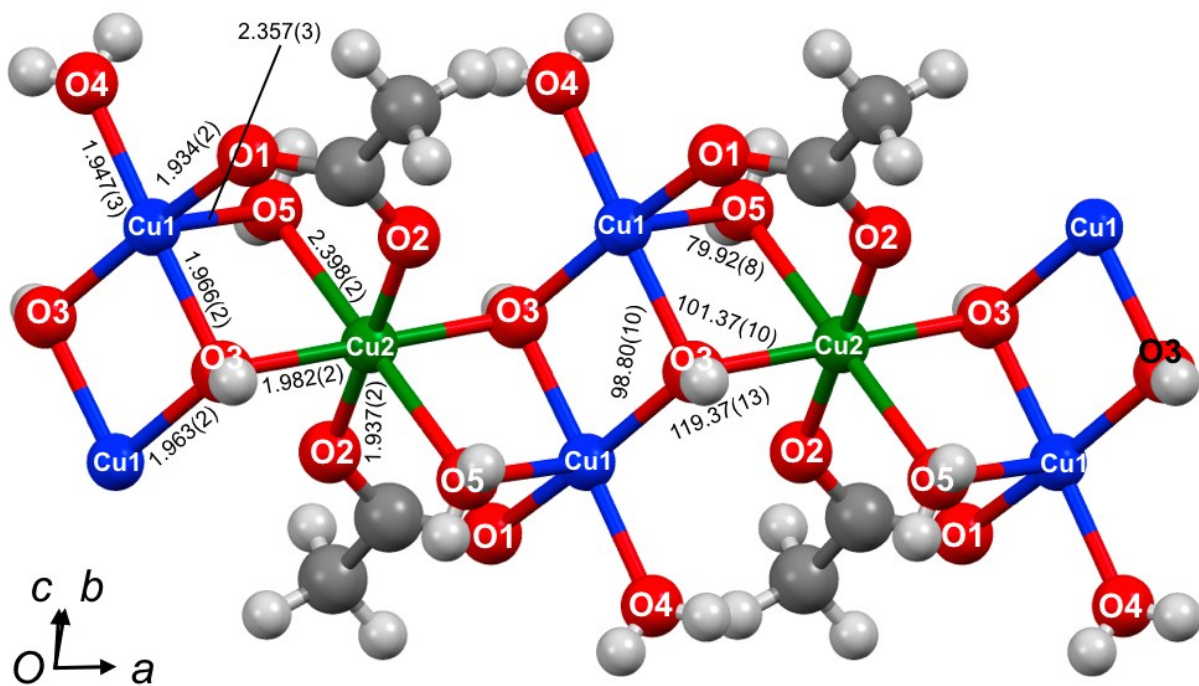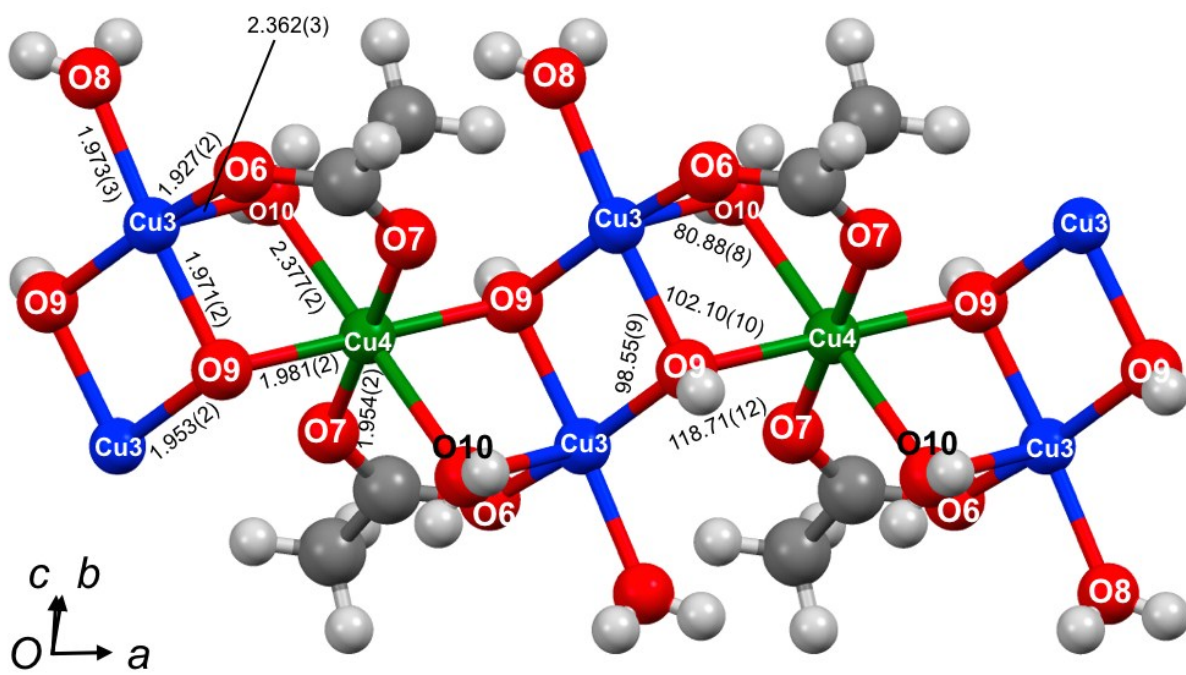

Figure S5. Selected Cu-O bond lengths and Cu-O-Cu bridging angles in the diamond chain units in **3**. Compound **3** has two kinds of diamond chain units.

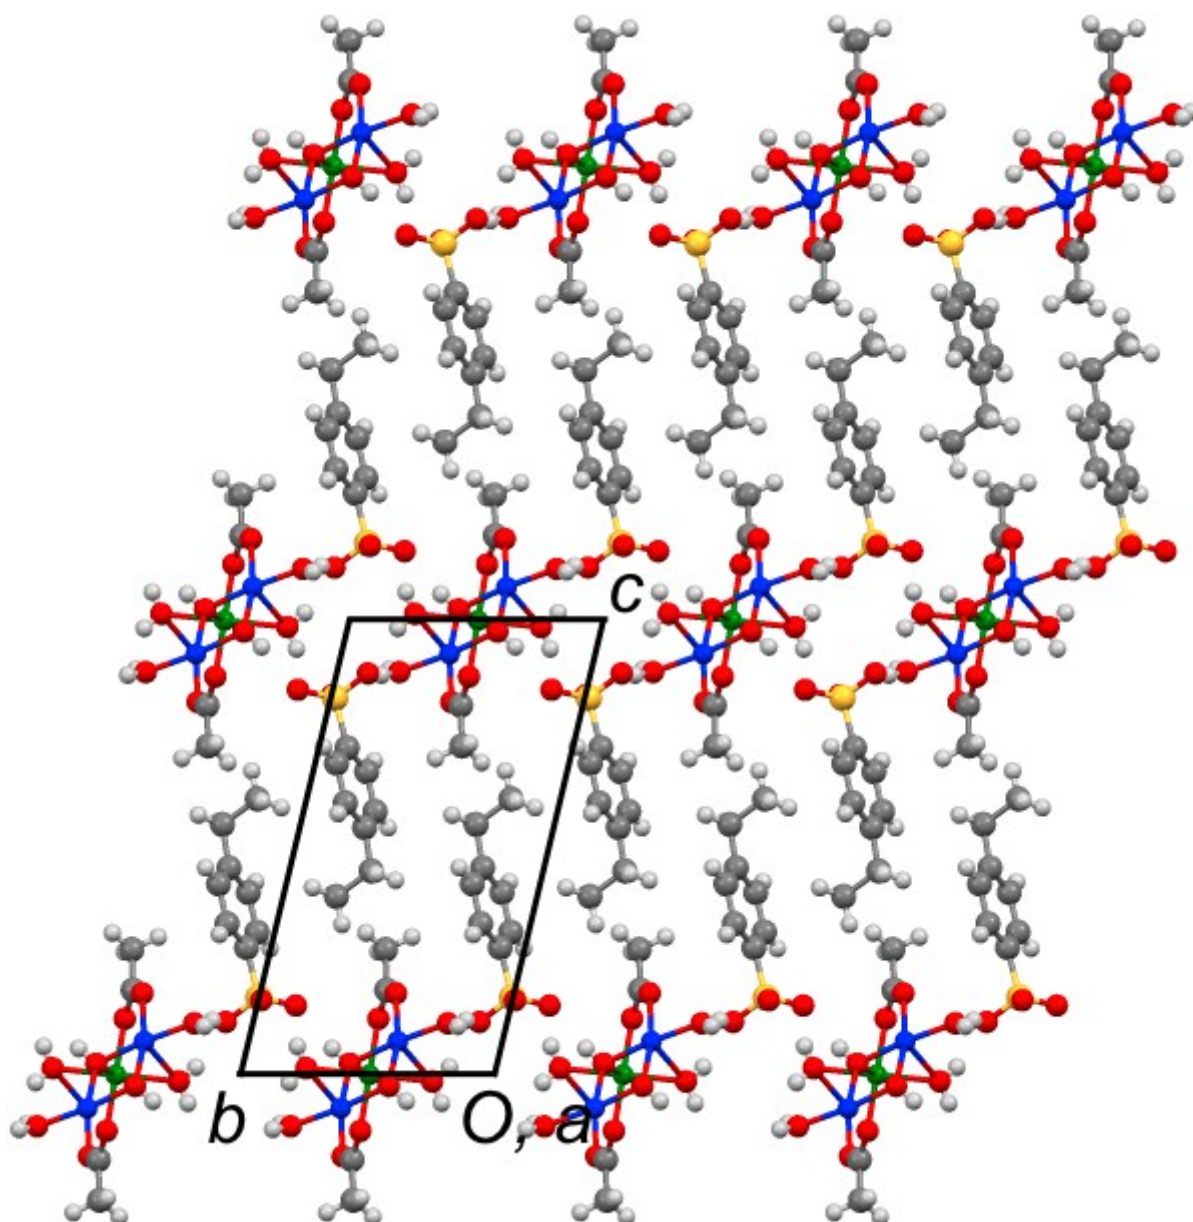

Figure S6. Crystal structure of **4** along the  $a$  axis. The spheres correspond to Cu (blue, green), O (red), C (dark grey), S (yellow), and H (light grey) atoms.

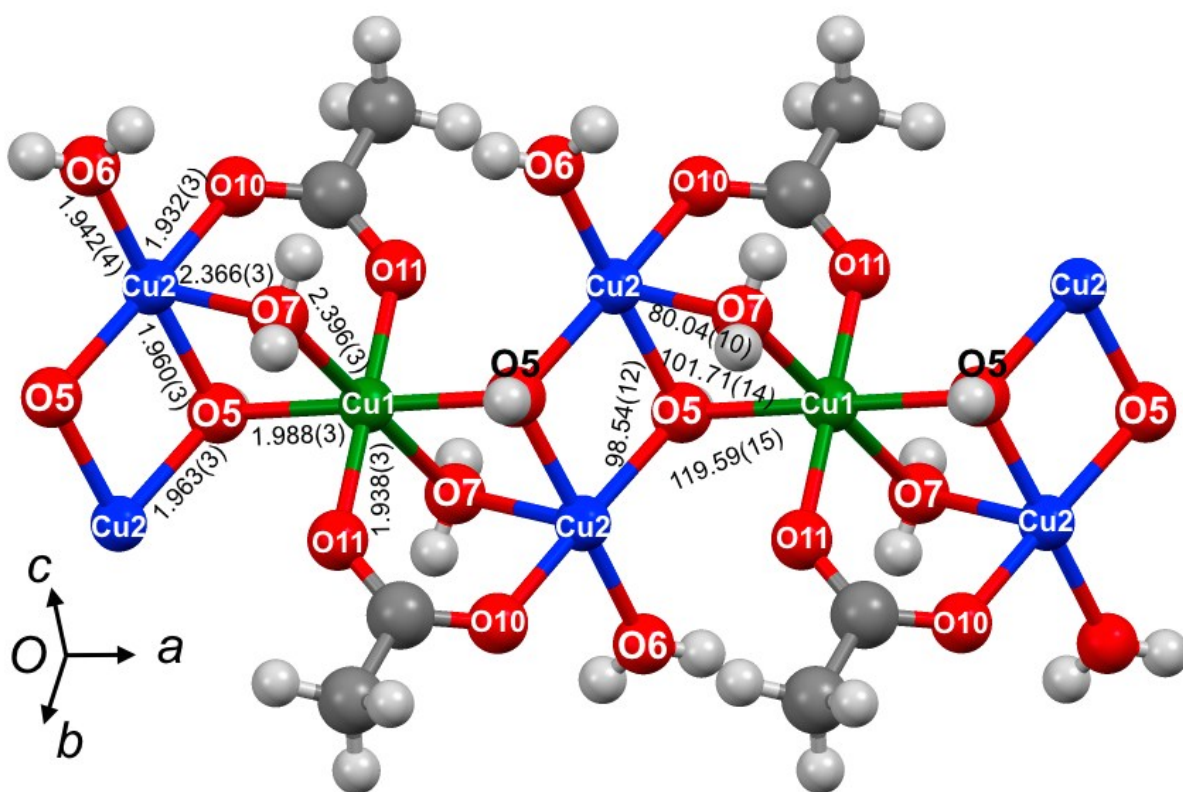

Figure S7. Selected Cu-O bond lengths and Cu-O-Cu bridging angles in the diamond chain unit in **4**.



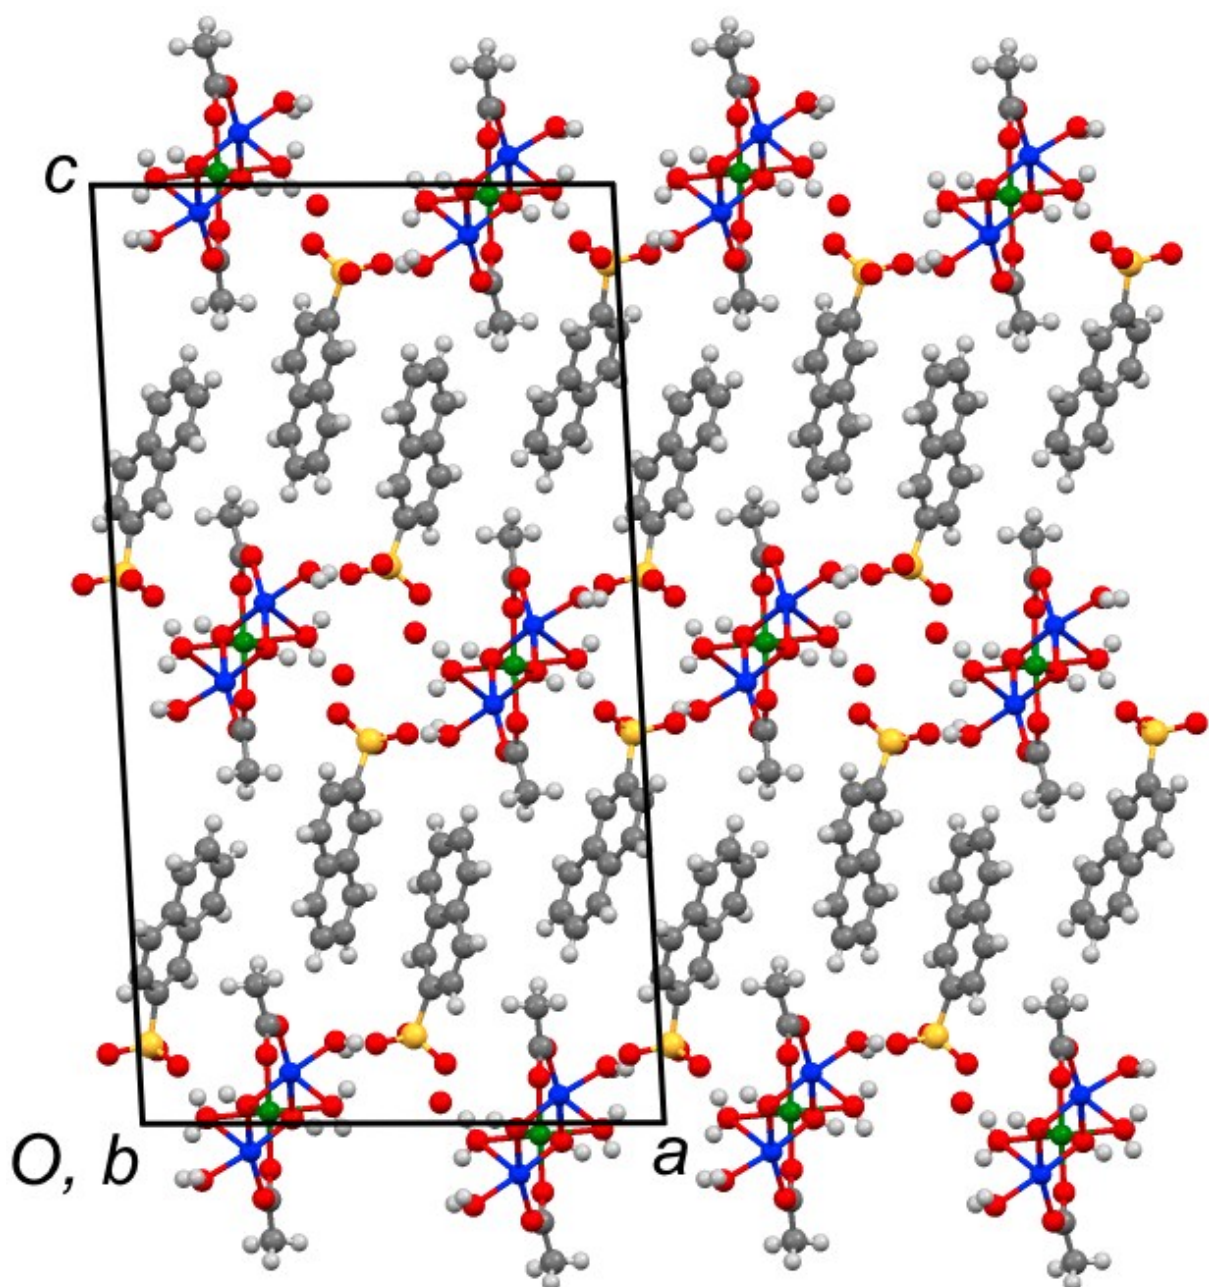

Figure S8. Crystal structure of **5** along the *b* axis. The spheres correspond to Cu (blue, green), O (red), C (dark grey), S (yellow), and H (light grey) atoms.

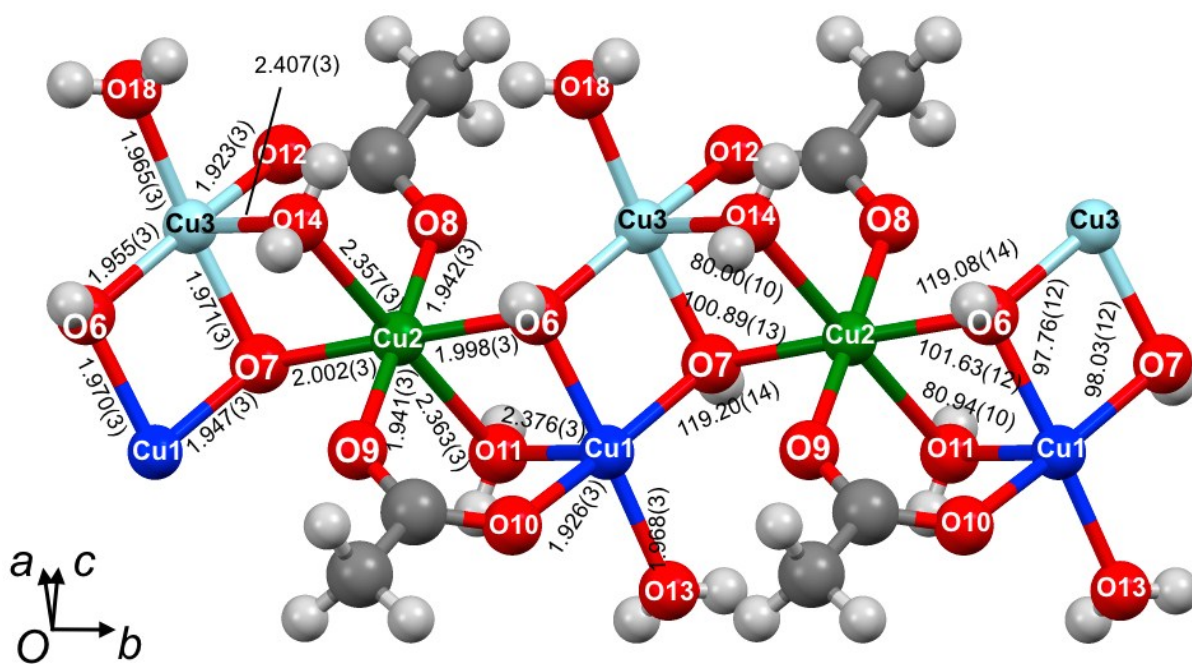

Figure S9. Selected Cu-O bond lengths and Cu-O-Cu bridging angles in the diamond chain unit in **5**.

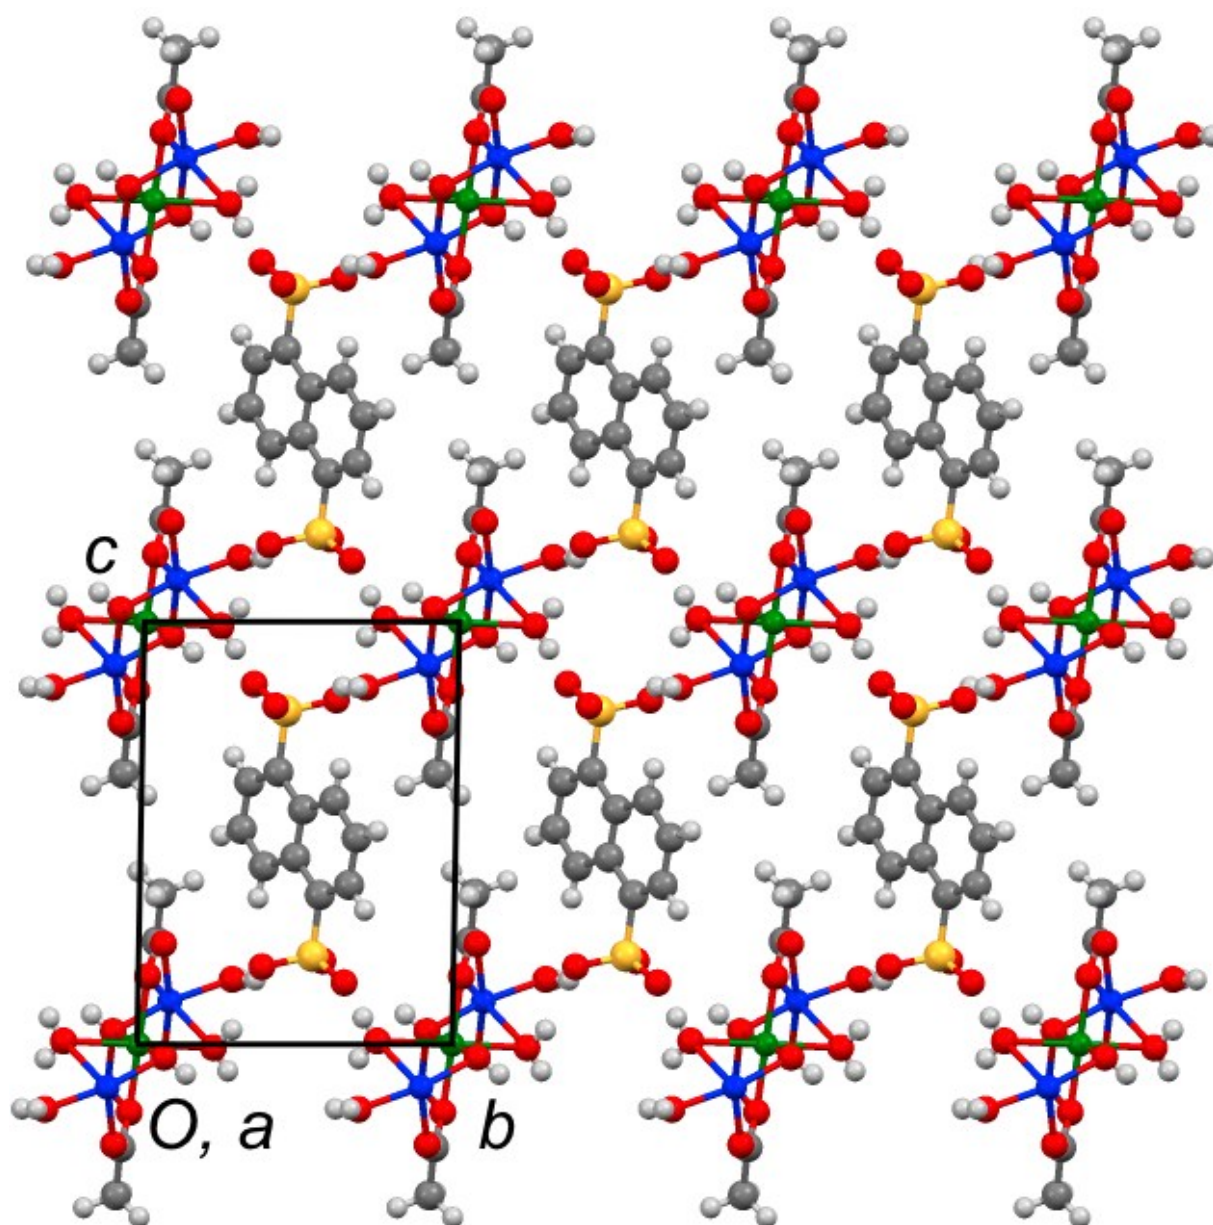

Figure S10. Crystal structure of **6** along the *a* axis. The spheres correspond to Cu (blue, green), O (red), C (dark grey), S (yellow), and H (light grey) atoms.



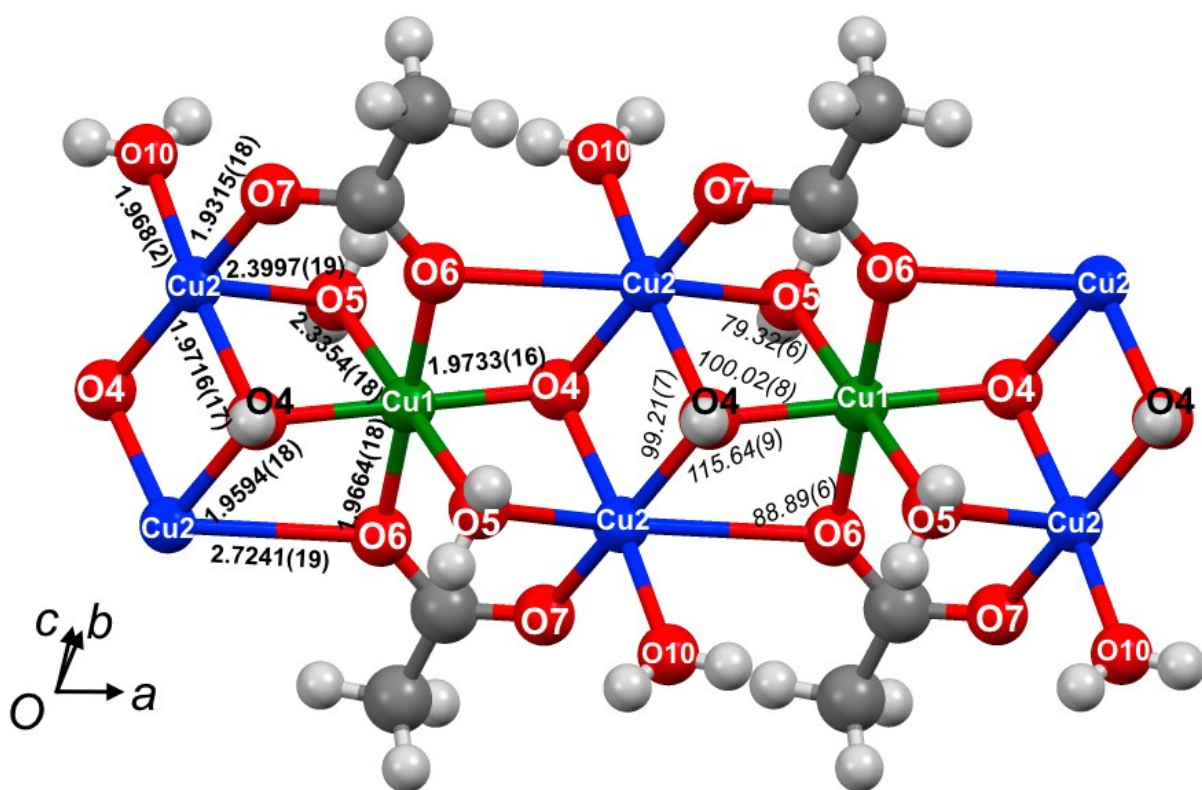

Figure S11. Selected Cu-O bond lengths and Cu-O-Cu bridging angles in the diamond chain unit in 6.

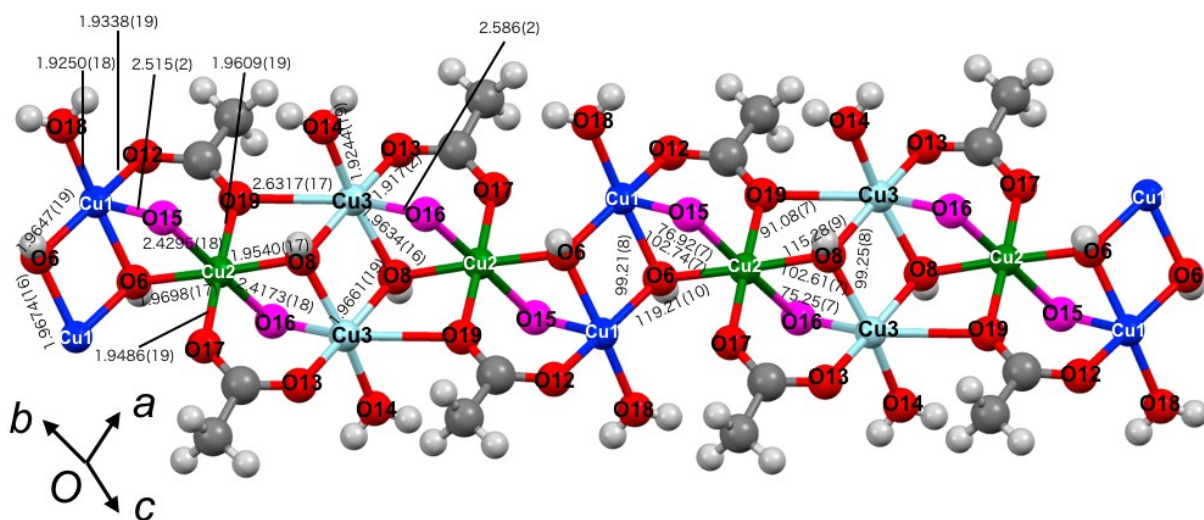

Figure S12. Selected Cu-O bond lengths and Cu-O-Cu bridging angles in the diamond chain unit in 7.



## 2. Field Dependence of Magnetization for 1-7

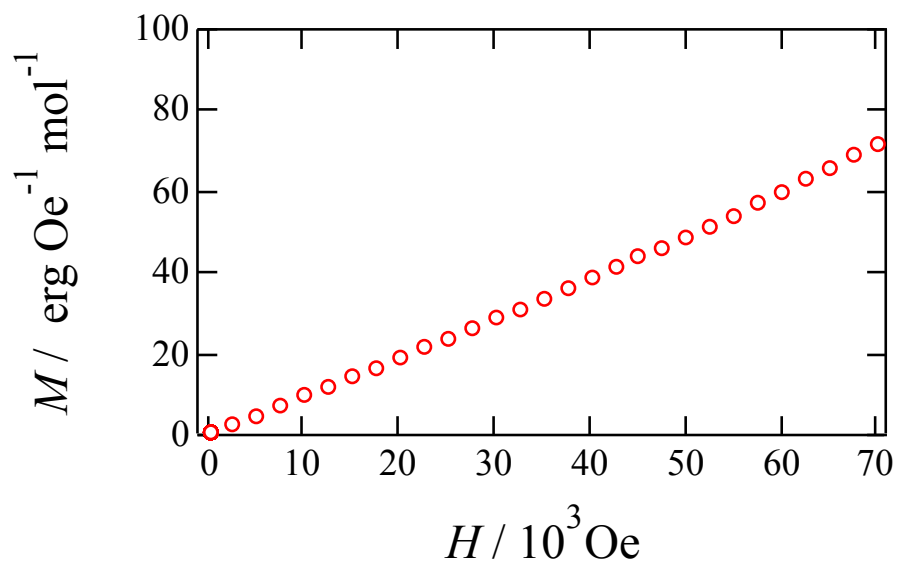

Figure S13. Field dependence of magnetization at 2 K in **1**.

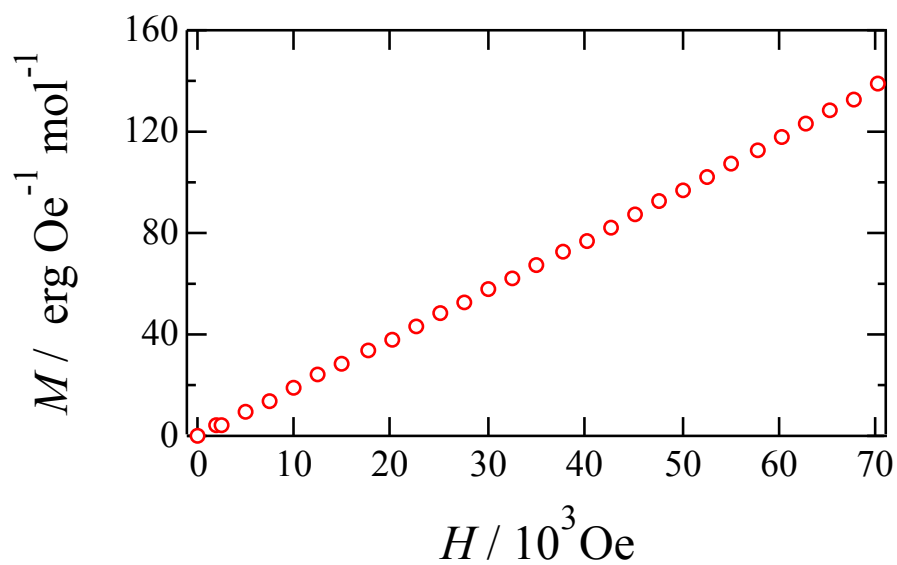

Figure S14. Field dependence of magnetization at 2 K in **2**.

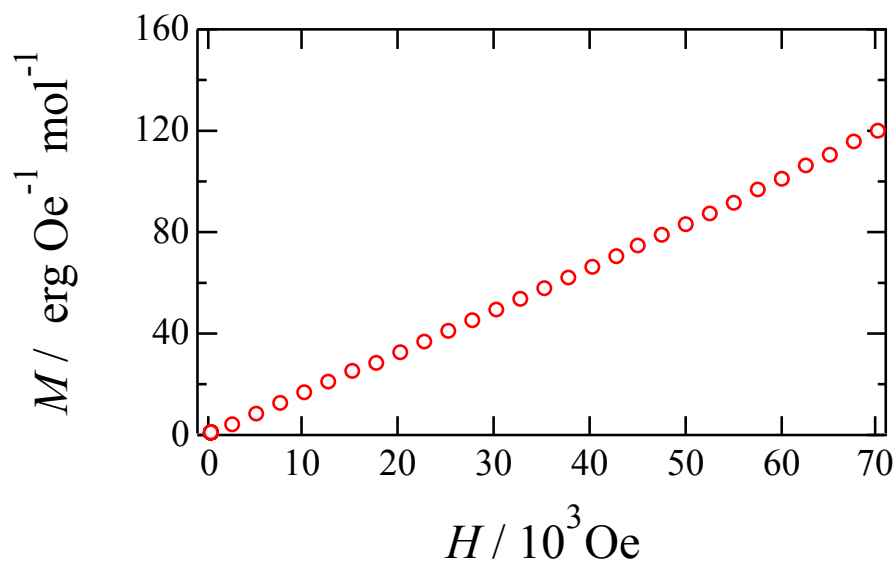

Figure S15. Field dependence of magnetization at 2 K in **3**.

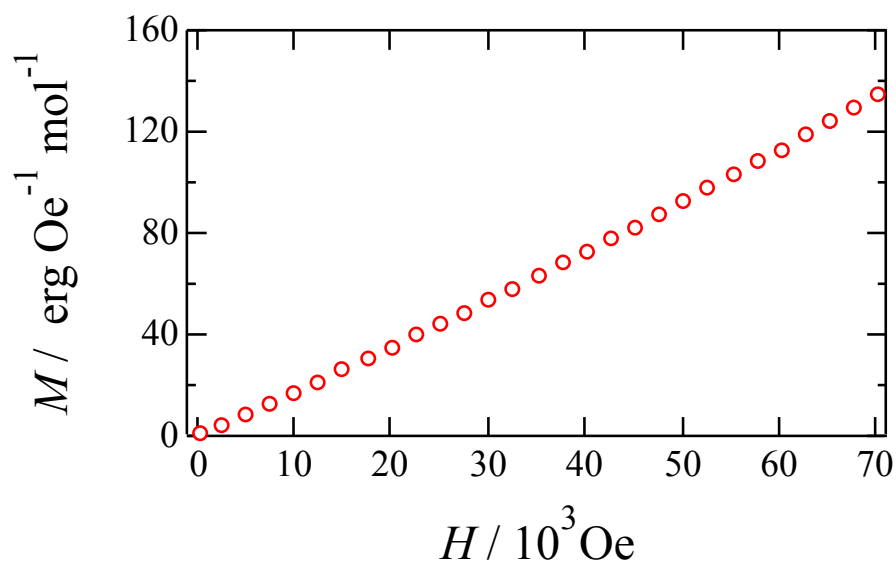

Figure S16. Field dependence of magnetization at 2 K in **4**.

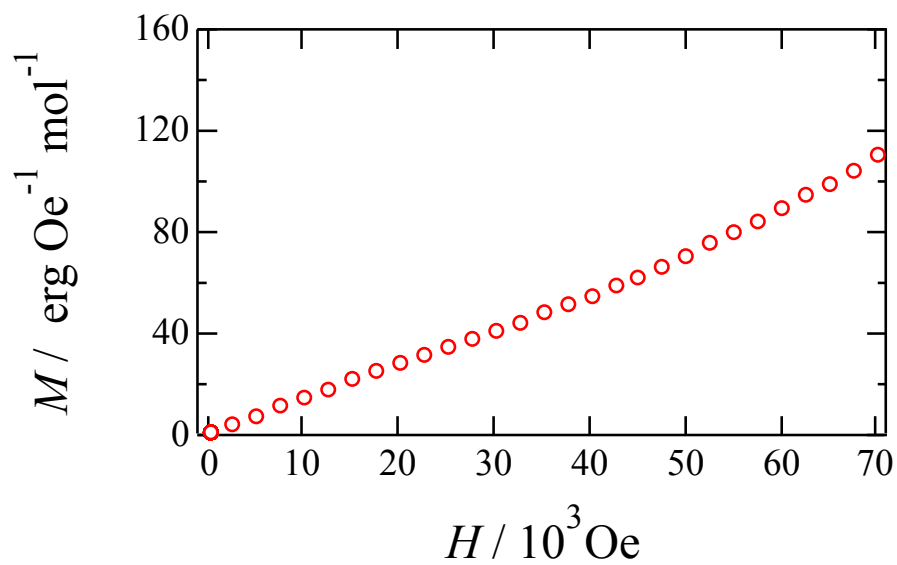

Figure S17. Field dependence of magnetization at 2 K in 5.

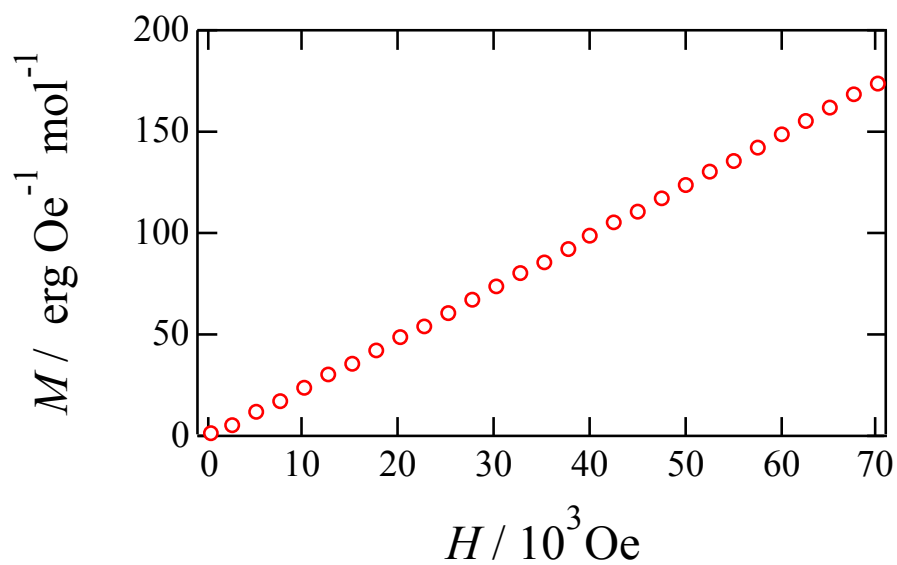

Figure S18. Field dependence of magnetization at 2 K in 6.

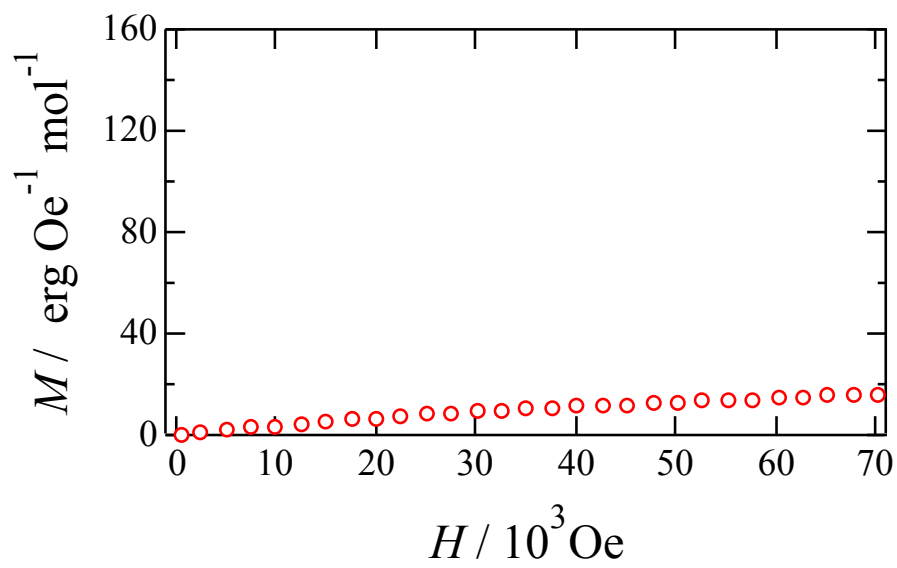

Figure S19. Field dependence of magnetization at 2 K in 7.



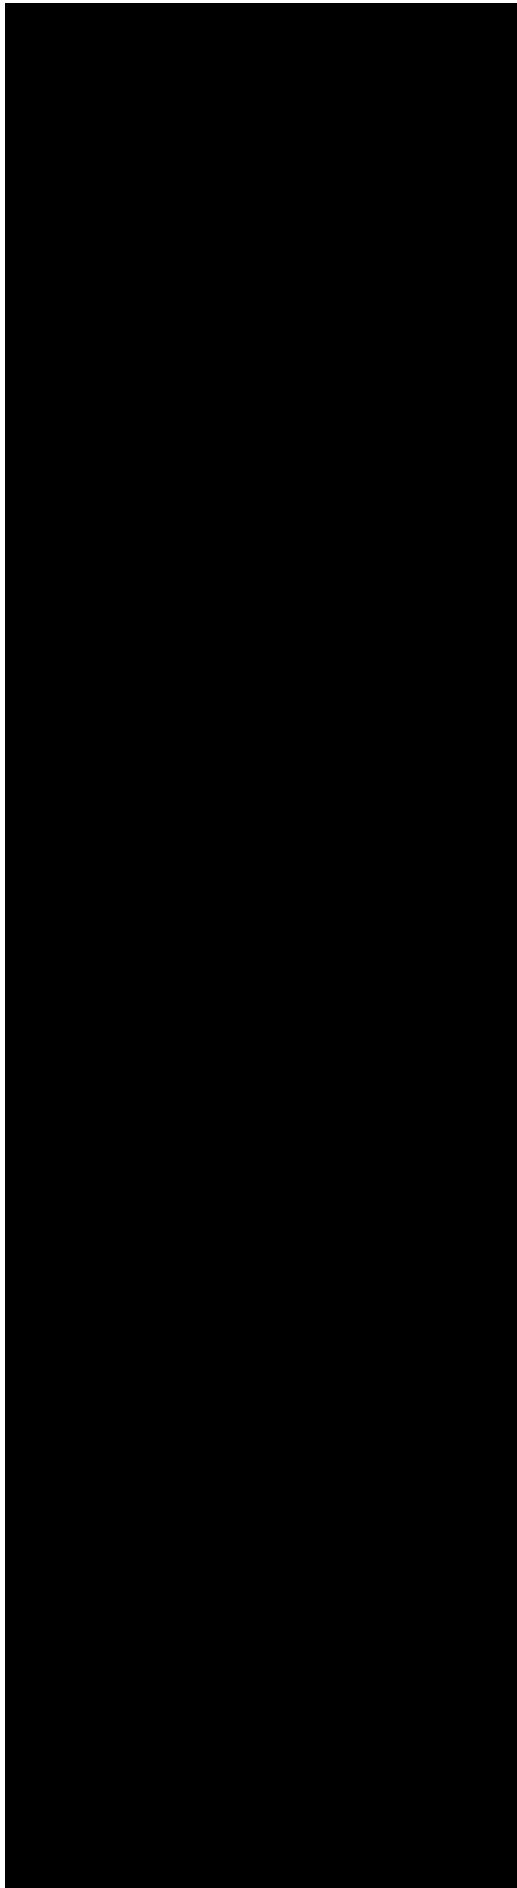

## References

- [1] H. Kikuchi, Y. Fujii, M. Chiba, S. Mitsudo, T. Idehara, T. Tonegawa, K. Okamoto, T. Sakai, T. Kuwai and H. Ohta, *Phys. Rev. Lett.* 2005, **94**, 227201.
- [2] S. Yoneyama, K. Kodama, K. Kikuchi, Y. Fujii, H. Kikuchi and W. Fujita, *CrystEngComm* 2014, **16**, 10385.
